# Supplementary material for: Novel Alligator Cathelicidin As-CATH8 Demonstrates Anti-Infective Activity against Clinically Relevant and Crocodylian Bacterial Pathogens
Source: MDPI journal article supplement (doi:10.3390/antibiotics11111603), 2022-11-11
Supplement: s1 [file s1]

## Supplementary Information

# Novel alligator cathelicidin As-CATH8 demonstrates anti-infective activity against clinically relevant and crocodylian bacterial pathogens

Felix L. Santana<sup>1,2</sup>, Karel Estrada<sup>3</sup>, Morgan A. Alford<sup>2</sup>, Bing C. Wu<sup>2</sup>, Melanie Dostert<sup>2</sup>, Lucas Pedraz<sup>2</sup>, Noushin Akhoundsadegh<sup>2</sup>, Pavneet Kalsi<sup>2</sup>, Evan F. Haney<sup>2</sup>, Suzana K. Straus<sup>4</sup>, Gerardo Corzo<sup>1,\*</sup>, and Robert E. W. Hancock<sup>2,\*</sup>

<sup>1</sup> Departamento de Medicina Molecular y Bioprocesos, Instituto de Biotecnología, Universidad Nacional Autónoma de México, Cuernavaca, 62210, Morelos, Mexico.

<sup>2</sup> Centre for Microbial Diseases and Immunity Research, University of British Columbia, Vancouver, V6T 1Z4, BC, Canada.

<sup>3</sup> Unidad de Secuenciación Masiva y Bioinformática, Instituto de Biotecnología, Universidad Nacional Autónoma de México, Cuernavaca, 62210, Morelos, Mexico.

<sup>4</sup> Department of Chemistry, University of British Columbia, Vancouver, V6T 1Z1, BC, Canada.

\* Correspondence: gerardo.corzo@ibt.unam.mx (GC); bob@hancocklab.com (REWH)

**Keywords:** cathelicidins; antimicrobial peptides; LL-37; biofilms; abscess model; skin model; reptiles

## Supplementary Tables

|                 |                                                                                                                                                                           |   |
|-----------------|---------------------------------------------------------------------------------------------------------------------------------------------------------------------------|---|
| <b>Table S1</b> | Cathelicidin sequences identified in <i>Alligator mississippiensis</i> , <i>Alligator sinensis</i> , <i>Crocodylus porosus</i> , and <i>Gavialis gangeticus</i> . . . . . | 3 |
| <b>Table S2</b> | Summary of prediction of identified cathelicidin sequences from <i>A. mississippiensis</i> , <i>A. sinensis</i> , <i>C. porosus</i> , and <i>G. gangeticus</i> . . . . .  | 6 |
| <b>Table S3</b> | Vertebrate cathelicidins peptides included in the phylogenetic analysis . .                                                                                               | 7 |
| <b>Table S4</b> | Antimicrobial activity of the crocodylian cathelicidins . . . . .                                                                                                         | 8 |
| <b>Table S5</b> | Biofilm inhibitory activity of the crocodylian cathelicidins . . . . .                                                                                                    | 9 |

## Supplementary Figures

|                  |                                                                                                                  |    |
|------------------|------------------------------------------------------------------------------------------------------------------|----|
| <b>Figure S1</b> | Multiple sequence alignment of novel and previously identified crocodylian cathelicidins . . . . .               | 10 |
| <b>Figure S2</b> | Biofilm inhibitory activity of crocodylian cathelicidin peptides against different bacterial pathogens . . . . . | 11 |
| <b>Figure S3</b> | Cytotoxic activity of crocodylian cathelicidins against human cells . . . . .                                    | 12 |
| <b>Figure S4</b> | Bacterial membrane depolarization and permeabilization capacity of As-CATH8 . . . . .                            | 13 |
| <b>Figure S5</b> | DNA binding activity of As-CATH8 . . . . .                                                                       | 14 |

## Supplementary Tables

**Table S1: Cathelicidin sequences identified in *Alligator mississippiensis*, *Alligator sinensis*, *Crocodylus porosus* and *Gavialis gangeticus*.** Previously described alligator cathelicidins AM-36 [1] (renamed here as Am-CATH4) and As-CATH1-6 [2] were also recovered in our analysis and are included as a reference. Putative elastase cleavage site that indicates the start of the mature sequence is denoted with an arrow (↓) and was inferred based on protein sequence alignment with As-CATH1-6 [2]. NCBI accession numbers and references are shown.

| Name      | Sequence                                                                                                                                                                                                  | Accession                     |
|-----------|-----------------------------------------------------------------------------------------------------------------------------------------------------------------------------------------------------------|-------------------------------|
| Am-CATH1  | MGRWGWGVLLGLAMLVASASASQHKMLSYYEAVSLAVDFYNQEPGIDHAFRLRLRA<br>DPQPAWDMTSKPRQELQFVVRETVCRAQDPPASECDFKDNGLVRNCTGLFSMER<br>ESPTVIITCDTVPTEQHVRV↓TRSERRNGHKRRRGSGSRRGQYSSTKHGGRKHP<br>RKRPGSGSRLGHETPHVAPIDKGHV | OL889930                      |
| Am-CATH3  | MGCRGWGVLLGLATLVAAASASQRKMLTYREAAFAVDFYNRQPGIDHTFQLLSV<br>EPQVPDTSKSRQEVRFVVCETVCPQADNHPDSECNIFNGLVRNCMWLLSTEH<br>KLPTSIITCDTVPKGHV↓PANPKLPGKGPGRHPSSGIWRGQGTFFSLPITKK<br>PVG                             | OL889932                      |
| Am-CATH4  | PDRV↓RRGLFKKLRRKIKKGFKKIFKRLPPIGVGVSIPLAGKR                                                                                                                                                               | Barksdale et al.,<br>OL889933 |
| Am-CATH5  | METCLCLLLLLGVATAVATAQAQAQTSQSQAQYEDAVTTAVDIFNQESGLPQ<br>AYRLLEAEPQSEWNPSSQAAQPLKFSVKETVCPIAQKGNLKCDFKENGVLVKDCS<br>GLFTAGKKPPVTAVKCEDTSQEPELV↓TRRKFWKILNGALKIAPFFLG                                       | OL889934                      |
| Am-CATH6  | MKSCWALVLLVGCMASAATAQSQNLNFNEAVSLAVDFYNRGLAVNNTFQLLRAPS<br>GDVSSPSEFRRLNFTIMETTCVGSQPTQELCQFKENGLVRACVGFSTQQVAP<br>LIVVTCEEAPSEPV↓RVTRWLWLLRGGLKAAGWGIRAHNLNRN                                            | OL889935                      |
| Am-CATH8  | APPAPALSSYQEALAAAVNTYNQESGLPQAYRLLEAEPQWPSSQPAQPLKFS<br>IKETECLVSEKRDVSQCPFKDKGLVKDCKGLYAEKEPPVITAKCEDAGQEPQLV<br>↓KRVNWPVKVGRVLRFLPYILGG                                                                 | OL889936                      |
| Am-CATH11 | MLVASASASQHKMLSYYEAVSLAVDFYNQEPGIDHAFRLRLRADPQPAWDMTSKPR<br>QELQFVVRETVCRAQDPPASECDFKDNGLVRNCTGLFSMERESPTVIITCDTVP<br>TEQHVRV↓RRSGWNNRSKRRRGSGSRRGRFSHIAHGGRKGHERIARV                                     | OL889931                      |

|          |                                                                                                                                                                                                         |                          |
|----------|---------------------------------------------------------------------------------------------------------------------------------------------------------------------------------------------------------|--------------------------|
| As-CATH1 | MGRWGWGVLLGLAMLVASASASQHKTLSYEEAVSLAVDFYNQEPGIDHAFRLRLRA<br>DPQPAWDMTSKPRQELRFVVRETVCRAQDPPASECDFKDNLVRNCTGLFSTER<br>ESPTVIITCDTVPQGHRV↓RRSGWWNGHKRRRGSGSRHGQYSSTKYGGRKRP<br>RKRPGSGSWLSHDTPHVAPIAKGHVG | Chen et al.,<br>ASN73761 |
| As-CATH2 | MGRWGWGVLLGLATFVAVALGSQHKTLSYEEAVSLAVDFYNQPGIDHAFRLRLRA<br>DPQPAWDMTSKPRQELRFVVRETVCRAQDPPASECDFKDNLVRNCTGLFSTER<br>ESPTVIITCDTVPQGHRV↓RRSGWWNGHKRRRGSGTRRGRFSHIAHGGRKGH<br>ERIA                        | Chen et al.,<br>ASN73762 |
| As-CATH3 | MGRWGWVLLVLLATLVAAASASQRKMLTYGEAASFAVDFYNQPGIDHTFQLLCV<br>EPQPVWDTTSKSRQEVRFVICETVCPQASNHASECNLKFNLVRNCTWLFSTEQ<br>KSPTSIITCNTVSPGKHV↓PAKPKPRPGKLSSTLHLAPGSDGKPRCHYP                                    | Chen et al.,<br>ASN73763 |
| As-CATH4 | MQTCWVILLPLLLGAASTEPLTPGTDPPLTPTYAQALATAVDVYNQPGVDFAF<br>RLLEAESRDDWDASTDPLRQLEFTLKETECVGEDQPLDQCDFKDGGAVLDCTGT<br>FSCSEASLMVLVTCQPAEPLPDRV↓RRGLFKKLRRKIKKGFKKIFKRLPPVGVG<br>VSIPLAGRR                  | Chen et al.,<br>ASN73764 |
| As-CATH5 | METCLRLLLLLVGAVATAQAQAQAQTQSQSQAGYEDAVTTAVDIFNQESGLPQ<br>AYRLLEAEPQSEWNPSSQAAQPLKFSVKETVCPAQKGNLQCDFKENGLVKDCS<br>GLFTAGKKPPVTAVKCEDTSQEPELV↓TRRKFWKKVLNGALKIAPFLG                                      | Chen et al.,<br>ASN73765 |
| As-CATH6 | MKSCWALVLLVGCMASAATAQSQLNFNEAVSLAVDFYNRGLAVNNTFQLLRTAPS<br>GDVSSPFEFRRLNFTIMETTCPVGGQPTQGPCQFKENGLVRACVGGFFSAQQVAP<br>LIVVTCEEAPSEPVRV↓TRWLWLLRGGLKAAGWGIRAHNLNRN                                       | Chen et al.,<br>ASN73766 |
| As-CATH7 | NPPQDLASQPVPQPLKFSIKETECLVSEKRDISQCPFKDKGLVKDCAGIYSAEKKP<br>PIVTANCEDAGQGPQLV↓KRVNWRKVGRNTALGASYVLSFLG                                                                                                  | OL889937                 |
| As-CATH8 | NPPQDLASQPVPQPLKFSIKETECLVSEKRDISQCPFKDKGLVKDCAGLYAEEKEP<br>PVITAKCEDAGQEPQLV↓KRVNWAKVGRTALKLLPYIFG                                                                                                     | OL889938                 |
| Cp-CATH3 | MGRRGWVLLGLATLVAAALASQRKLLSYGEAASFAVDFYNQPGVDHTFRLLDV<br>EPQPAWDTMAKSCQEVRFVVRETVCPTHKLPAASECDFKDNLVRNCTWLFSTKL<br>KLPASIIITCDTMTPGKDI↓HAKPKPKPGKDERGRPGSGSWIGKGTFFSFPITKK<br>PVG                       | OL889940                 |
| Cp-CATH5 | MGTCLRLLLLLVGAVATAGLTPPARAQAQAQAQAQASYETAVATAVDIYNQEPGL<br>AQAYRLLEAEPQDSWNPASQAAQPLKFTVKETTCPAQKGNLQCDFKENGLIKD<br>CSGLFTAGKKPPVTDVKVDASQEPELV↓TRKKWWKKVLKGAIKTALK                                     | OL889941                 |

|           |                                                                                                                                                                                                 |          |
|-----------|-------------------------------------------------------------------------------------------------------------------------------------------------------------------------------------------------|----------|
| Cp-CATH7  | AFPRTPQDLASQPVQPLRFSIKETTCLVSEKRDVRQCPFKDEGLVKDCTGIYSAE<br>KKPPIVTAVCKDAGQEPELV↓KRVNWRKIGLGASYVMSWL G                                                                                           | OL889942 |
| Cp-CATH10 | MGRRGWVLLALATLAAGALGSQHRTLSYEEAVSLAVNFYNQGPIDHAFRLLRA<br>DPQPAWDMTSQPRQELRFVVRETVC PRAQDPPASECDFQDNGLVRNCTGLFSTER<br>ESPTVIITCDTATPGQHARV↓RRSGWRDRIKRHRGSDSRLGYMTPFSTNINKG                      | OL889939 |
| Gg-CATH2  | MGRRGWVLLGLATLVAVALGSQHKTLSYEEAVSLAVSFYNQGPIDRAFRLRA<br>DPQPAWDMTSKPRQELRFVVRETVC PRAQDPPASECDFKDHGLVRNCTGLFSMER<br>ESPTVIITCDTVTPGQHVRV↓RRSGWWDWIKGRRGSGSRRGRFTHIAHGSGSKGH<br>GNNGNIA          | OL889943 |
| Gg-CATH4  | MQTCWVLLLLLLPLLGAASDLPDTPGTDLQPMP SYA QALATAVDVYNQSGSVDA<br>AFQVLEAESRDDWDANEDPLRQLGFRLKETEC PVGEDQPLDQCDFKDGGA VL DCT<br>ATFSCSEASLMVLVTCQPAEPPPTRD↓RRGLFKKLRRKIKKAFKKVFKRLPPVG<br>VGVSIPLSGHR | OL889944 |
| Gg-CATH5  | SPQNPSSQAAQPLKFSVKETVCPIAQKGNLQQCNFKENGLIKDCSGLFTA AKKPP<br>VTDVKCVDASQEPELV↓TRRKWKKVLNGAIKIAPYILD                                                                                              | OL889945 |
| Gg-CATH6  | MKSCWALVVLVGCMAS TAA AQS QLN FNEAVSLAVDFYNRGLAVNNTFQLLR TAPE<br>GDVVSKPFEFRRLNFTIMETTC PVAGQLPSEPCQFKENGLVRACVGFFSAQQVAP<br>LIVVTCEEAPSEPVRV↓TRWIGLV RGGLKLAGWGLR TYLNRNR                       | OL889946 |
| Gg-CATH7  | MQPCLRALLVLGA AVAVAMAVALPAPPAPAPKGYQEALAAAINTYNQESGLPQAY<br>RLLEAEPQPQWDPASQPVQPLKFSIKETTCLVSEKRDVSQCLFKDKGLVKDCTGI<br>YSVEKQPPIVTAVCKDAGQEPELV↓KRVNWRKVGLGASYVMSWL G                           | OL889947 |
| Gg-CATH9  | MGRRGWVLLGLATLVAVALGSQHKTLSYEEAVSLAVSFYNQGPIDRAFRLRA<br>DPQPAWDMTSKPRQELRFVVRETVC PRAQDPPASECDFKDHGLVRNCTGLFSMER<br>ESPTVIITCDTVTPGQHVRV↓RRSGRWDWIKGRRGSGSRRGHYSTIRRGRKGS GR                    | OL889948 |

Am: *A. mississippiensis*; As: *A. sinensis*; Cp: *C. porosus*; Gg: *G. gangeticus*

**Table S2: Summary of prediction of identified cathelicidin sequences from *A. mississippiensis*, *A. sinensis*, *C. porosus*, and *G. gangeticus*.** Previously described alligator cathelicidin sequences Am-CATH4 [1] and As-CATH1-6 [2] were also recovered in the analysis and are included in this table as a reference.

| Name      | Genome assembly               | Strand | Start  | Stop   | Missing region | References       |
|-----------|-------------------------------|--------|--------|--------|----------------|------------------|
| Am-CATH1  | gi_397460297_gb_JH735204      | -      | 83125  | 93242  | No             | -                |
| Am-CATH3  | gi_397456510_gb_JH738990      | -      | 0      | 6010   | No             | -                |
| Am-CATH4  | gi_397462851_gb_JH732650      | -      | 60     | 12217  | N-ter          | Barksdale et al. |
| Am-CATH5  | gi_397462851_gb_JH732650      | -      | 24092  | 34308  | No             | -                |
| Am-CATH6  | AKHW03001069                  | -      | 5231   | 15336  | No             | -                |
| Am-CATH8  | AKHW03001069                  | -      | 33404  | 42943  | N-ter          | -                |
| Am-CATH11 | AKHW03000909                  | +      | 2068   | 12185  | N-ter          | -                |
| As-CATH1  | gi_555310491_ref_NW_005843086 | -      | 367921 | 378020 | No             | Chen et al.      |
| As-CATH2  | gi_555311385_ref_NW_005842192 | +      | 460    | 10559  | No             | Chen et al.      |
| As-CATH3  | gi_555311385_ref_NW_005842192 | +      | 5263   | 15383  | No             | Chen et al.      |
| As-CATH4  | gi_555310491_ref_NW_005843086 | -      | 0      | 6074   | No             | Chen et al.      |
| As-CATH5  | gi_555311385_ref_NW_005842192 | +      | 25222  | 35432  | No             | Chen et al.      |
| As-CATH6  | gi_555311385_ref_NW_005842192 | +      | 53173  | 63350  | No             | Chen et al.      |
| As-CATH7  | gi_555311385_ref_NW_005842192 | +      | 12151  | 22328  | N-ter          | -                |
| As-CATH8  | gi_555311385_ref_NW_005842192 | +      | 16243  | 26462  | N-ter          | -                |
| Cp-CATH3  | gi_698053534_gb_JRXG01102469  | -      | 0      | 6985   | No             | -                |
| Cp-CATH5  | gi_698089567_gb_JRXG01066436  | +      | 4753   | 14996  | No             | -                |
| Cp-CATH7  | gi_698089567_gb_JRXG01066436  | +      | 0      | 5837   | N-ter          | -                |
| Cp-CATH10 | gi_698084222_gb_JRXG01071781  | -      | 2052   | 12151  | C-ter          | -                |
| Gg-CATH2  | gi_699340657_gb_JRWT01256782  | -      | 0      | 2350   | No             | -                |
| Gg-CATH4  | gi_699490068_gb_JRWT01141868  | +      | 6112   | 13962  | No             | -                |
| Gg-CATH5  | gi_699490071_gb_JRWT01141865  | +      | 0      | 4273   | N-ter          | -                |
| Gg-CATH6  | gi_699490068_gb_JRWT01141868  | +      | 0      | 7535   | No             | -                |
| Gg-CATH7  | gi_699518732_gb_JRWT01120362  | +      | 0      | 7133   | No             | -                |
| Gg-CATH9  | gi_699359619_gb_JRWT01242099  | +      | 7      | 10103  | C-ter          | -                |

-: in references denotes the current study

**Table S3: Vertebrate cathelcidins peptides included in the phylogenetic analysis.** Scientific and common names for each species, as well as the cathelcidin peptide names and NCBI accession numbers are listed. Previously described alligator cathelcidins and all crocodylian cathelcidins identified in this study are shown in Table S1.

| Vertebrate group | Species                       | Common name                   | Peptide      | Accession    |
|------------------|-------------------------------|-------------------------------|--------------|--------------|
| Amphibian        | <i>Odorrana livida</i>        | Green cascade frog            | OI-CATH2     | AXR75914     |
|                  | <i>Bufo gargarizans</i>       | Asiatic toad                  | Bg-CATH      | ANV28414     |
| Bird             | <i>Gallus gallus</i>          | Chicken                       | Gga-CATH1    | NP_001001605 |
|                  | <i>Phasianus colchicus</i>    | Ring-necked pheasant          | Pc-CATH3     | ACZ45041     |
|                  | <i>Coturnix japonica</i>      | Japanese quail                | Cj-CATH2     | BAW94547     |
|                  | <i>Coturnix coturnix</i>      | Common quail                  | Cj-CATH3     | ACZ45043     |
|                  | <i>Columba livia</i>          | Rock pigeon                   | Cl-CATH      | XP_005512199 |
|                  | <i>Anas platyrhynchos</i>     | Mallard                       | Ap-CATH      | ALD83753     |
|                  | <i>Gallus gallus</i>          | Chicken                       | Gga-CATH2    | NP_001020001 |
|                  | <i>Cygnus atratus</i>         | Black swan                    | Ca-CATH      | XP_035410280 |
|                  | <i>Gallus gallus</i>          | Chicken                       | Gga-CATH3    | NP_001298106 |
|                  | <i>Naja atra</i>              | Chinese cobra                 | Na-CRAMP     | B6S2X0       |
| Reptile          | <i>Bothrops atrox</i>         | Barba amarilla                | Batroxicidin | U5KJC9       |
|                  | <i>Hydrophis cyanocinctus</i> | Asian annulated sea snake     | Hc-CATH      | AKJ54480     |
|                  | <i>Python bivittatus</i>      | Burmese python                | Pb-CATH      | XP_007443270 |
|                  | <i>Python bivittatus</i>      | Burmese python                | Pb-CATH      | XP_007442672 |
|                  | <i>Pelodiscus sinensis</i>    | Chinese soft shelled turtle   | Ps-CATH2     | XP_006114479 |
|                  | <i>Trimerodytes annularis</i> | Red-bellied annulate keelback | Ta-CATH      | QBZ68899     |
|                  | <i>Chelonia mydas</i>         | Green sea turtle              | Cm-CATH2     | XP_007066511 |
|                  | <i>Chelonia mydas</i>         | Green sea turtle              | Cm-CATH      | XP_007066509 |
|                  | <i>Pseudonaja textilis</i>    | Tropical rattlesnake          | Pt-CATH1     | U5KJJ1       |
|                  | <i>Bungarus fasciatus</i>     | Banded crait                  | Bf-CATH      | B6D434       |
|                  | <i>Python bivittatus</i>      | Python                        | Pb-CATH      | XP_007445262 |
|                  | <i>Pelodiscus sinensis</i>    | Chinese soft shelled turtle   | Ps-CATH3     | AWW22372     |
|                  | <i>Crocodylus siamensis</i>   | Siamese crocodile             | Cs-CATH      | AYV89837     |
|                  | <i>Mus musculus</i>           | House mouse                   | Mm-CATH      | AAB88303     |
|                  | <i>Oryctolagus cuniculus</i>  | Rabbit                        | Oc-CATH      | NP_001075774 |

|        |                                       |                 |               |              |
|--------|---------------------------------------|-----------------|---------------|--------------|
| Mammal | <i>Pan paniscus</i>                   | Bonobo          | Pp-CATH       | XP_003818474 |
|        | <i>Canis lupus familiaris</i>         | Dog             | Clu-CATH      | NP_001003359 |
|        | <i>Ovis aries</i>                     | Sheep           | Bactinecin-11 | AAB62000     |
|        | <i>Equus caballus</i>                 | Horse           | Ec-CATH3      | NP_001075399 |
|        | <i>Sus scrofa</i>                     | Pig             | Protegrin-4   | NP_999028    |
|        | <i>Trachypithecus cristatus</i>       | Silvery lutung  | Tc-CATH       | B6S2X2       |
|        | <i>Sarcophilus harrisii</i>           | Tasmanian devil | Sh-CATH2      | XP_012398889 |
|        | <i>Homo sapiens</i>                   | Human           | LL-37         | NP_004336    |
|        | <i>Bos taurus</i>                     | Cattle          | BMAP-27       | NP_777257    |
|        | <i>Macaca mulatta</i>                 | Rhesus monkey   | Mmul-CATH     | NP_001028681 |
|        | <i>Trichechus manatus latirostris</i> | Florida manatee | Tm-CATH2      | XP_023586559 |

**Table S4: Antimicrobial activity of the crocodylian cathelicidins.** The MIC values of the synthetic peptides were determined in a microdilution assay in MHB. The antibiotic vancomycin was used against Gram-positive *S. aureus* and *E. faecium* whereas polymyxin B was employed against the remaining Gram-negative strains.

| Bacteria              | MIC in $\mu\text{M}$ ( $\mu\text{g/mL}$ ) |            |            |            |         |             |            |
|-----------------------|-------------------------------------------|------------|------------|------------|---------|-------------|------------|
|                       | As-CATH7                                  | As-CATH8   | Gg-CATH5   | Gg-CATH7   | LL-37   | Polymyxin B | Vancomycin |
| <i>E. cloacae</i>     | 0.5 (1.3)                                 | 0.5 (1.2)  | 0.5 (1.3)  | 2 (4.6)    | n.d.    | 0.5 (0.6)   | n.d.       |
| <i>S. aureus</i>      | 4 (10.8)                                  | 0.5 (1.2)  | 1 (2.7)    | 16 (37)    | n.d.    | n.d.        | 0.5 (0.7)  |
| <i>K. pneumoniae</i>  | 1 (2.7)                                   | 0.5 (1.2)  | 0.5 (1.3)  | 4 (9.2)    | n.d.    | 0.5 (0.6)   | n.d.       |
| <i>A. baumannii</i>   | 0.25 (0.7)                                | 0.25 (0.6) | 0.5 (1.3)  | 1 (2.3)    | n.d.    | 0.5 (0.6)   | n.d.       |
| <i>P. aeruginosa</i>  | 4 (10.8)                                  | 1 (2.4)    | 1 (2.7)    | 8 (18.5)   | n.d.    | 0.5 (0.6)   | n.d.       |
| <i>E. faecium</i>     | >64 (>172)                                | >64 (>156) | >64 (>171) | 64 (148)   | n.d.    | n.d.        | >64 (>93)  |
| <i>E. coli</i>        | 2 (5.4)                                   | 1 (2.4)    | 4 (10.7)   | 4 (9.2)    | 8 (36)  | 0.5 (0.6)   | n.d.       |
| <i>S. Typhimurium</i> | 2 (5.4)                                   | 1 (2.4)    | 0.5 (1.3)  | 4 (9.2)    | 16 (72) | 1 (1.2)     | n.d.       |
| <i>P. vulgaris</i>    | >64 (>172)                                | 4 (9.7)    | 8 (21)     | >64 (>148) | n.d.    | >64 (>77)   | n.d.       |

n.d.: not determined

**Table S5: Biofilm inhibitory activity of the crocodylian cathelicidins.** The MBIC<sub>95</sub> values of the synthetic peptides were determined by a microdilution assay using crystal violet to stain the adhered bacterial biomass. MBIC<sub>95</sub> was defined as the minimal peptide concentration capable of inhibiting mean biofilm growth by at least 95% compared to the untreated control.

| <b>Bacteria</b>       | <b>MBIC<sub>95</sub> in <math>\mu\text{M}</math> (<math>\mu\text{g/mL}</math>)</b> |                 |                 |                 |
|-----------------------|------------------------------------------------------------------------------------|-----------------|-----------------|-----------------|
|                       | <b>As-CATH7</b>                                                                    | <b>As-CATH8</b> | <b>Gg-CATH5</b> | <b>Gg-CATH7</b> |
| <i>E. cloacae</i>     | 32 (86)                                                                            | 4 (9.7)         | 4 (10.7)        | 16 (37)         |
| <i>S. aureus</i>      | 4 (10.8)                                                                           | 1 (2.4)         | 1 (2.7)         | 4 (9.2)         |
| <i>A. baumannii</i>   | 1 (2.7)                                                                            | 0.5 (1.2)       | 0.5 (1.3)       | 1 (2.3)         |
| <i>P. aeruginosa</i>  | >64 (>172)                                                                         | 64 (156)        | 32 (85)         | >64 (>148)      |
| <i>E. coli</i>        | 32 (86)                                                                            | 1 (2.4)         | 32 (85)         | 32 (74)         |
| <i>S. Typhimurium</i> | 1 (2.7)                                                                            | 1 (2.4)         | 1 (2.7)         | 4 (9.2)         |

## Supplementary Figures

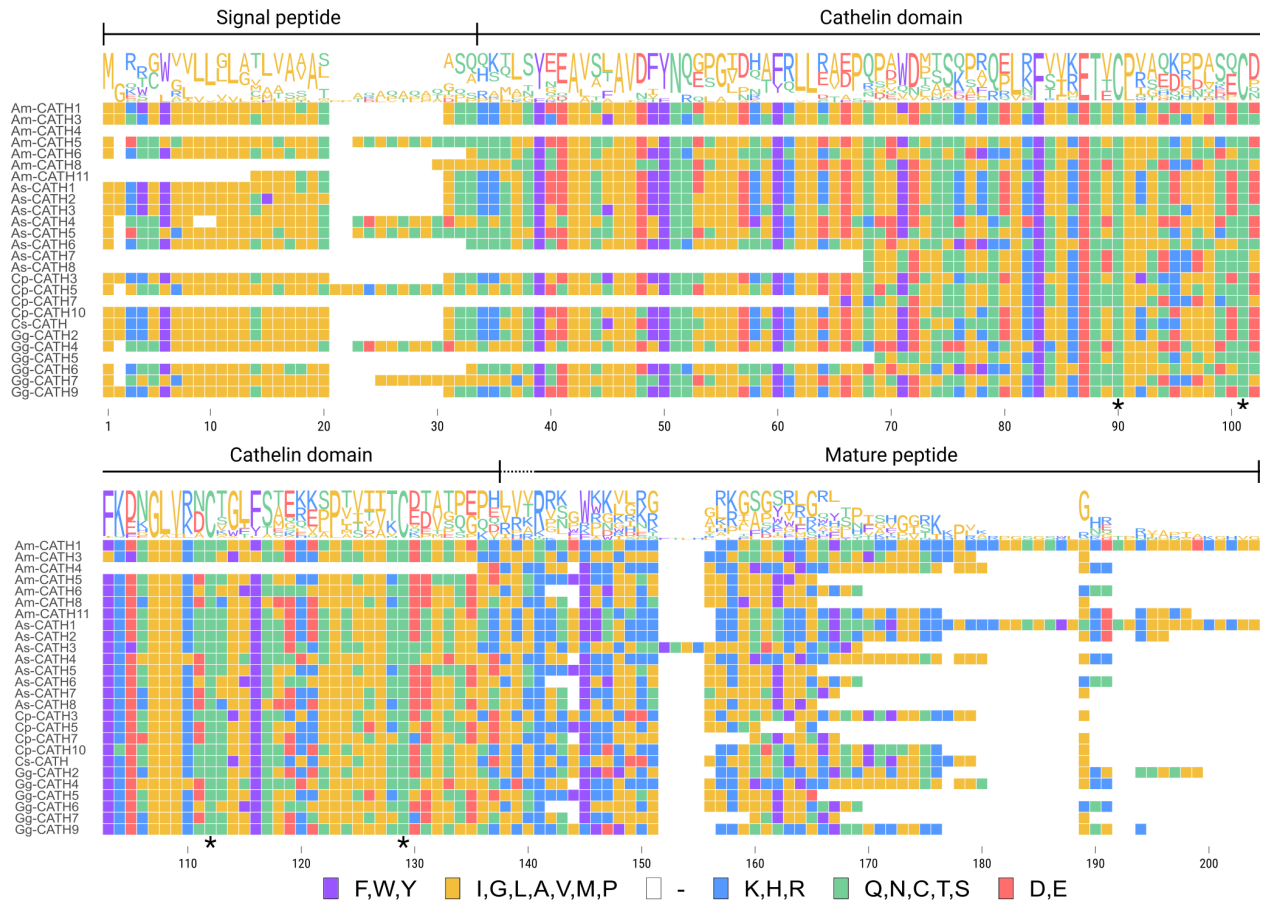

**Figure S1: Multiple sequence alignment of novel and previously identified crocodylian cathelicidins.** Crocodylian cathelicidins showed the three classical domains present in the cathelicidin family of host defense peptides (HDPs): the signal peptide, cathelin domain, and mature peptide region. The sequences were aligned using the MAFFT algorithm and visualized in R with the package ggmsa version 1.0.3. Amino acid residues are colored according to the Chemistry-AA coloring scheme. Highly conserved cysteines in the cathelin domain are marked with black asterisks (\*). Previously described cathelicidins Am-CATH4 [1], As-CATH1-6 [2], and Cs-CATH [3] were also included. Putative elastase cleavage site to process the mature peptide is located within residues 138-140 depending on the sequence. Abbreviations: Am: *A. mississippiensis*; As: *A. sinensis*; Cp: *C. porosus*; Cs: *C. siamensis*; Gg: *G. gangeticus*.

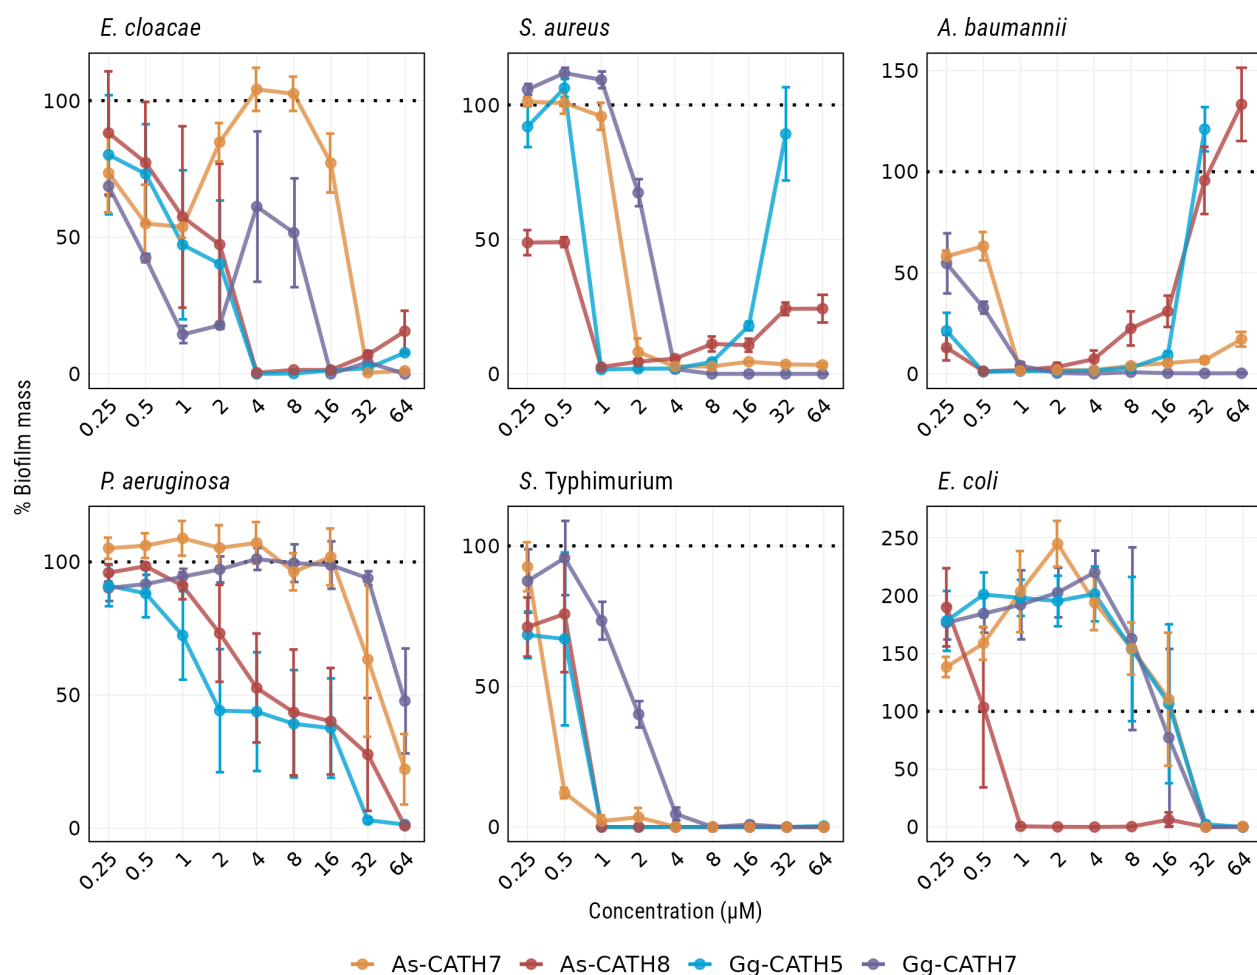

**Figure S2: Biofilm inhibitory activity of crocodylian cathelicidin peptides against different bacterial pathogens.** Dose-response curves were obtained in different media depending on the bacterial strain and, after 24 h treatment, the adhered biofilm mass was stained with crystal violet. Results are displayed as percentage of biofilm mass with respect to the growth control (defined as 100%). The mean  $\pm$  standard error of the mean of at least three biological replicates is shown. Cathelicidins As-CATH8 and Gg-CATH5 enhanced crystal violet staining of *S. aureus* and *A. baumannii* (10% TSB supplemented with 0.1% glucose) at high concentrations. However, this is likely the result of peptide and/or dead bacteria precipitation and not due to an increase in biofilm mass since no bacterial colonies were recovered from these wells. For visualization purposes, the data point corresponding to Gg-CATH5 (64  $\mu$ M) is not shown for these two bacteria.

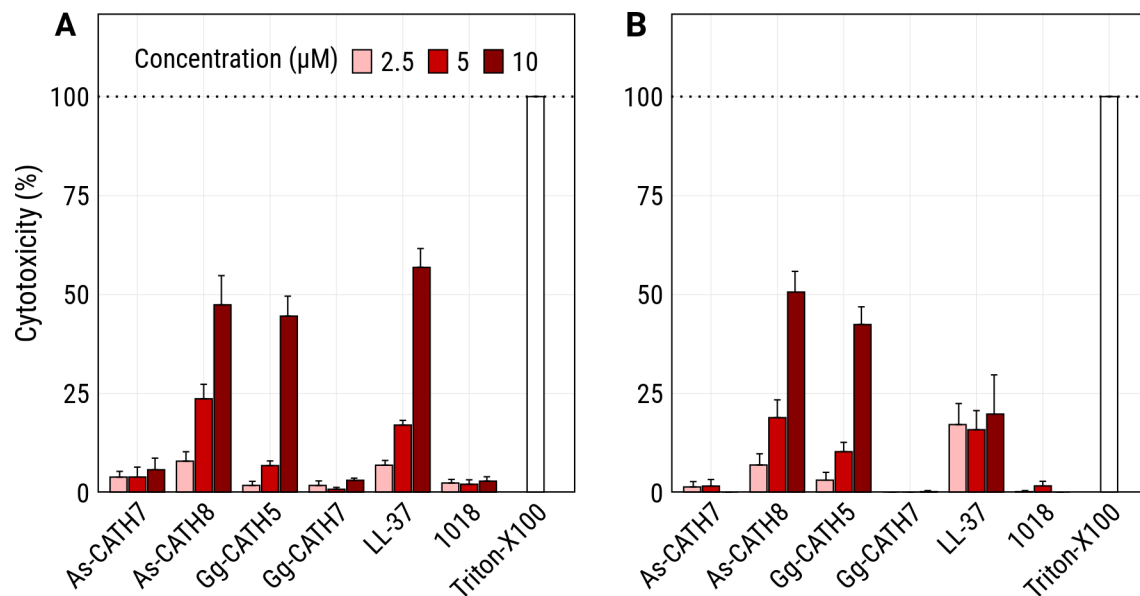

**Figure S3: Cytotoxic activity of crocodylian cathelicidins against human cells.** The peptide-induced cytotoxicity was measured with the LDH release assay. Values are presented as percentage of cytotoxicity relative to the positive control (cells treated with 2% Triton X-100). Mean  $\pm$  standard error of six biological replicates is shown. Human cathelicidin LL-37 and immunomodulatory peptide 1018 were included as a comparison and control, respectively. **A:** Cytotoxicity against the human bronchial epithelial (HBE) cell line. **B:** Cytotoxicity against human peripheral blood mononuclear cells (PBMCs).

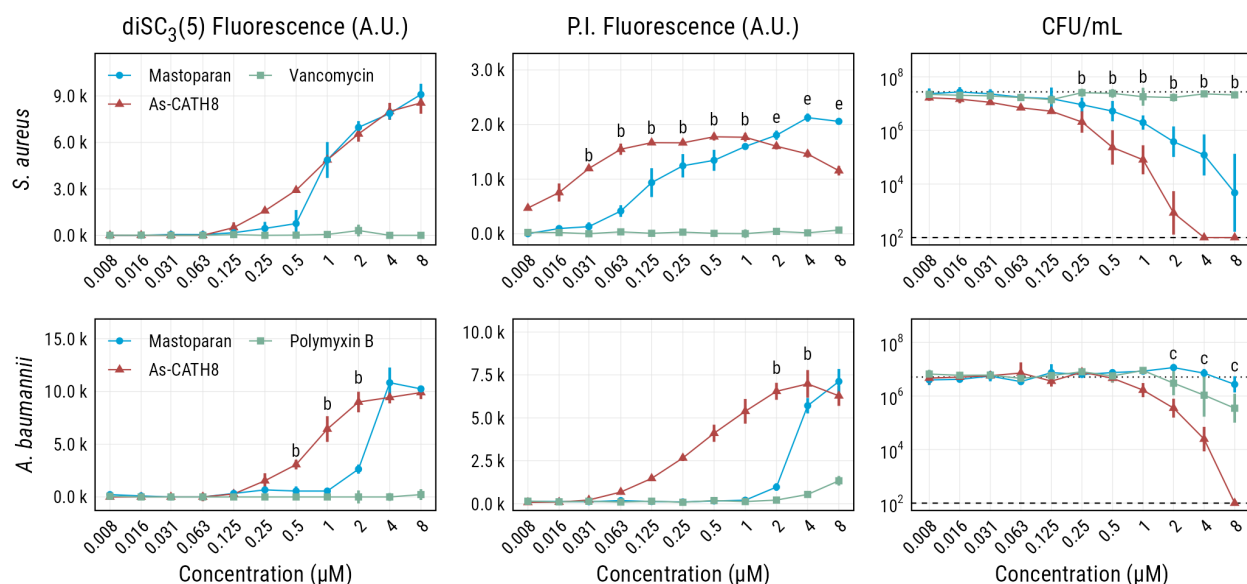

**Figure S4: Bacterial membrane depolarization and permeabilization capacity of As-CATH8.** The activity against *S. aureus* and *A. baumannii* planktonic cells were evaluated using diSC<sub>3</sub>(5) and propidium iodide (PI) dyes, revealing alterations of membrane potential and permeabilization of cells, respectively. The membrane-permeabilizing peptide Mastoparan was used as positive control. Fluorescence readings (arbitrary units), after 1 h treatment against planktonic cells, are shown as mean  $\pm$  standard error, whereas CFU data is presented as geometric mean  $\times$ / geometric standard deviation. The geometric mean of the CFU counts corresponding to the untreated control is shown as dotted lines. Peptidic antibiotics vancomycin and polymyxin B were used as a comparison for *S. aureus* and *A. baumannii*, respectively. Letters denote statistically significant differences ( $p < 0.05$ ) between As-CATH8 and antibiotics (b), As-CATH8 and Mastoparan (c) or antibiotics and Mastoparan (e), according to the Kruskal-Wallis test followed by the Dunn's post hoc test with the Benjamini-Hochberg correction for multiple comparisons. Experiments were performed at least three times.



## Supplementary References

1. Barksdale, S.M.; Hrifko, E.J.; van Hoek, M.L. Cathelicidin Antimicrobial Peptide from *Alligator Mississippiensis* Has Antibacterial Activity Against Multi-Drug Resistant *Acinetobacter Baumannii* and *Klebsiella Pneumoniae*. *Dev. Comp. Immunol.* **2017**, *70*, 135–144, doi:10.1016/j.dci.2017.01.011.
2. Chen, Y.; Cai, S.; Qiao, X.; Wu, M.; Guo, Z.; Wang, R.; Kuang, Y.-Q.; Yu, H.; Wang, Y. As-Cath1-6, Novel Cathelicidins with Potent Antimicrobial and Immunomodulatory Properties from *Alligator Sinensis*, Play Pivotal Roles in Host Antimicrobial Immune Responses. *Biochem. J.* **2017**, *474*, 2861–2885, doi:10.1042/BCJ20170334.
3. Tankrathok, A.; Punpad, A.; Kongchaiyapoom, M.; Sosiangdi, S.; Jangpromma, N.; Daduang, S.; Klaynongsruang, S. Identification of the First *Crocodylus Siamensis* Cathelicidin Gene and Rn15 Peptide Derived from Cathelin Domain Exhibiting Antibacterial Activity. *Biotechnol. Appl. Biochem.* **2019**, *66*, 142–152, doi:10.1002/bab.1709.
